# Supplementary material for: Association between Psychological Factors and Evacuation Status and the Incidence of Cardiovascular Diseases after the Great East Japan Earthquake: A Prospective Study of the Fukushima Health Management Survey
Source: Preprints.org preprint supplement (doi:10.20944/preprints202009.0339.v1), 2020-09-16
Supplement: Supplementary file 1 [file supplementary]

## Sheet: Supplemental
Table S1. Gender-specific age-adjusted and multivariable HRs (95% CIs) of CVDs according to evacuation status.
	Evacuee	Non-evacuee	p for interaction a
Men
Person-years	21768	37319
Psychological distress
Total CVD (n)	145	156
Age-adjusted HR	1.41 (1.18–1.68)	1.50 (1.27–1.77)	0.61
Multivariable-adjusted HR b	1.32 (1.10–1.59)	1.35 (1.14–1.60)	0.69
Stroke (n)	45	47
Age-adjusted HR	1.59 (1.15–2.20)	1.65 (1.21–2.24)	0.88
Multivariable-adjusted HR	1.49 (1.07–2.08)	1.54 (1.13–2.11)	0.92
Heart disease (n)	124	138
Age-adjusted HR	1.46 (1.21–1.77)	1.60 (1.34–191)	0.51
Multivariable-adjusted HR	1.39 (1.14–1.69)	1.41 (1.18–1.70)	0.59
Trauma reaction
Total CVD (n)	262	261
Age-adjusted HR	1.55 (1.34–1.79)	1.48 (1.29–1.70)	0.66
Multivariable-adjusted HR	1.48 (1.27–1.72)	1.37 (1.19–1.57)	0.65
Stroke (n)	86	88
Age-adjusted HR	1.84 (1.42–2.40)	1.82 (1.44–2.32)	0.98
Multivariable-adjusted HR	1.79 (1.36–2.35)	1.75 (1.37–2.24)	0.95
Heart disease (n)	163	218
Age-adjusted HR	1.58 (1.35–1.86)	1.49 (1.28–1.73)	0.57
Multivariable-adjusted HR	1.52 (1.29–1.79)	1.35 (1.16–1.57)	0.56
Women
Person-years	30710	48639
Psychological distress
Total CVD (n)	192	257
Age-adjusted HR	1.39 (1.18–1.62)	1.53 (1.34–1.76)	0.36
Multivariable-adjusted HR	1.33 (1.12–1.56)	1.44 (1.26–1.66)	0.41
Stroke (n)	47	64
Age-adjusted HR	1.58 (1.13–2.20)	1.43 (1.08–1.87)	0.67
Multivariable-adjusted HR	1.50 (1.07–2.11)	1.32 (1.00–1.74)	0.63
Heart disease (n)	143	203
Age-adjusted HR	1.38 (1.16–1.64)	1.57 (1.35–1.82)	0.29
Multivariable-adjusted HR	1.30 (1.09–1.56)	1.47 (1.26–1.71)	0.32
Trauma reaction
Total CVD (n)	283	379
Age-adjusted HR	1.27 (1.10–1.47)	1.54 (1.37–1.74)	0.04
Multivariable-adjusted HR	1.20 (1.04–1.40)	1.47 (1.30–1.66)	0.04
Stroke (n)	66	104
Age-adjusted HR	1.35 (1.00–1.83)	1.62 (1.28–2.05)	0.27
Multivariable-adjusted HR	1.26 (0.92–1.73)	1.53 (1.21–1.95)	0.25
Heart disease (n)	244	315
Age-adjusted HR	1.30 (1.11–1.52)	1.54 (1.35–1.76)	0.08
Multivariable-adjusted HR	1.22 (1.04–1.43)	1.46 (1.27–1.67)	0.09
Abbreviations: CVD, cardiovascular disease; HR, hazards ratio; CI, confidence interval. Notes: a p for interaction was calculated for
the cross-product terms of evacuation status and psychological distress or trauma reaction on CVD. b Adjusted for age, smoking status,
alcohol consumption, physical activity, sleep quality, and job loss.
